# Supplementary material for: Non-Invasive Mapping of Cerebral Autoregulation Using Near-Infrared Spectroscopy: A Study Protocol
Source: MDPI journal article supplement (doi:10.3390/mps6030058), 2023-06-09
Supplement: s1 [file s1]

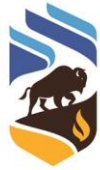

# Volunteers Needed!

Interested in Participating in Neuroscience Research?  
Interested in Having Your Brain Monitored Using Cutting-  
Edge Technology?

We are actively looking for participants aged 18 and older to participate in the healthy  
volunteer study entitled:

***“Non-Invasive Mapping of Cerebral Autoregulation Using Near Infrared  
Spectroscopy: A Healthy Control Study”***

This study is run out of Dr. Frederick Zeiler’s cerebrovascular physiology laboratory at the University of Manitoba. It involves 60 minutes of your time to have various aspects of brain physiology continuously monitored non-invasively through static recording and perturbation testing (orthostatic challenge, vascular chemo-reactivity, and neurovascular coupling impact). Various types of non-invasive monitors will be applied simultaneously, including: non-invasive arterial blood pressure, Near Infrared Spectroscopy, and Respiratory Monitor.

To be eligible you need to:

1. Be 18 years or older
2. Have no history of neurological conditions
3. Have no history of cardiovascular conditions (i.e., stroke, heart disease, peripheral vascular disease)

**Volunteers will receive reimbursement for their participation.**

**For more information email: [amanjyot.sainbhi@umanitoba.ca](mailto:amanjyot.sainbhi@umanitoba.ca)**

**call: 1-204-787-2909**

(To reach Dr. Zeiler’s Laboratory Team)
