# Supplementary material for: Non-Invasive Mapping of Cerebral Autoregulation Using Near-Infrared Spectroscopy: A Study Protocol
Source: Methods Protoc. 2023 Jun 9;6(3):58. doi: 10.3390/mps6030058 (PMC10304987; doi:10.3390/mps6030058)
Supplement: Supplementary file 1 [file mps-06-00058-s001.zip]

Archive with 4 entries (4 files):
- supplementary File S1.pdf
- supplementary File S2.pdf
- supplementary File S3.pdf
- supplementary File S4.pdf
